# Supplementary material
Source: Springer Nature journal article supplement (https://www.springermedizin.de/resource/supplementary/12876_2008_248_MOESM3_ESM.pdf/9439008)

### Nocturnal Esophageal Acidity

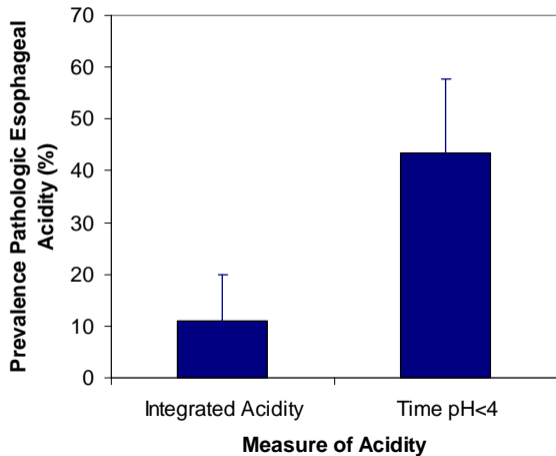

### Nocturnal Esophageal Acidity Records with Normal Integrated Acidity and Pathologic Time pH<4

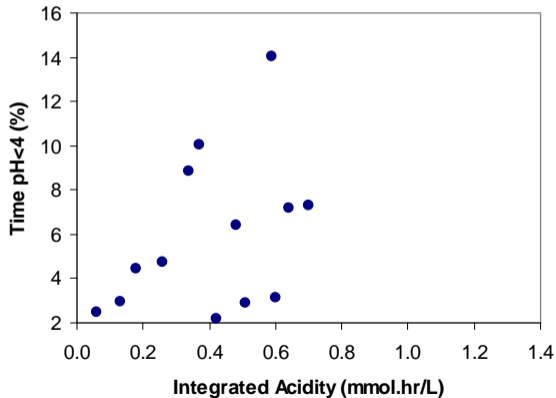

Supplement: MOESM3 [file 9439008]
